# Supplementary material for: Highly Active Low Cobalt Content-Based Bulk MoS2 Hydrodesulfurization Catalysts with a Unique Impact of H2S
Source: Hindawi journal article supplement (doi:10.1155/2018/8076534), 2018-09-03
Supplement: f1 [file 8076534.f1.zip]

Archive with 3 entries (3 files):
- 8076534.f1/Figure S1_JCHEM_2428380.pdf
- 8076534.f1/Figure S2_JCHEM_2428381.pdf
- 8076534.f1/Figure S3_JCHEM_2428382.pdf
