# Supplementary material for: Highly Active Low Cobalt Content-Based Bulk MoS2 Hydrodesulfurization Catalysts with a Unique Impact of H2S
Source: Hindawi journal article supplement (doi:10.1155/2018/8076534), 2018-09-03

Fig. S3. Product distribution curves of DBT HDS over MPC catalyst in the absence of  $\text{H}_2\text{S}$ ;  $340\text{ }^\circ\text{C}$  &  $3\text{MPa H}_2$ .

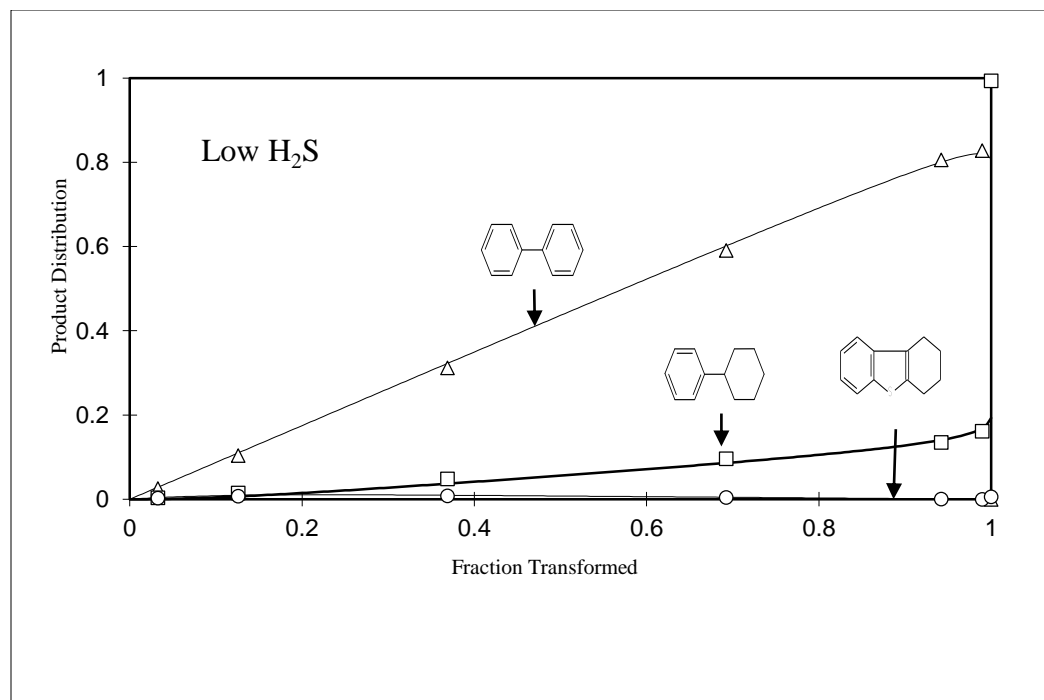

Supplement: f1 [file 8076534.f1.zip]
