# Supplementary material for: Highly Active Low Cobalt Content-Based Bulk MoS2 Hydrodesulfurization Catalysts with a Unique Impact of H2S
Source: Hindawi journal article supplement (doi:10.1155/2018/8076534), 2018-09-03

Fig. S1. Pseudo zero-order kinetics of HDS of DBT over MPC catalyst in the presence or absence of  $\text{H}_2\text{S}$ .

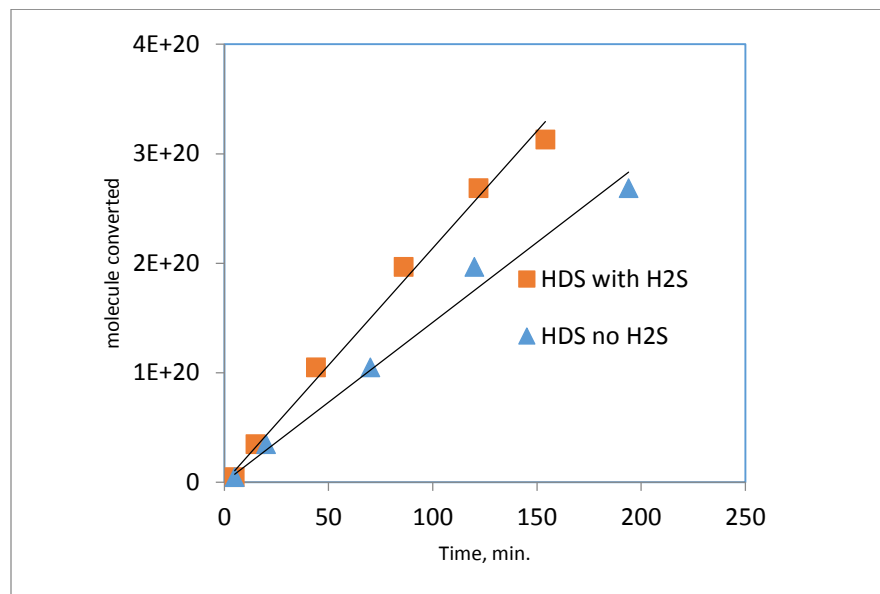

Supplement: f1 [file 8076534.f1.zip › 8076534.f1/Figure S1_JCHEM_2428380.pdf]
