# Supplementary material for: Highly Active Low Cobalt Content-Based Bulk MoS2 Hydrodesulfurization Catalysts with a Unique Impact of H2S
Source: Hindawi journal article supplement (doi:10.1155/2018/8076534), 2018-09-03

Fig. S2. Product distribution curves of DBT HDS over MPC catalyst in the presence of H<sub>2</sub>S; 340 °C & 3MPa H<sub>2</sub>.

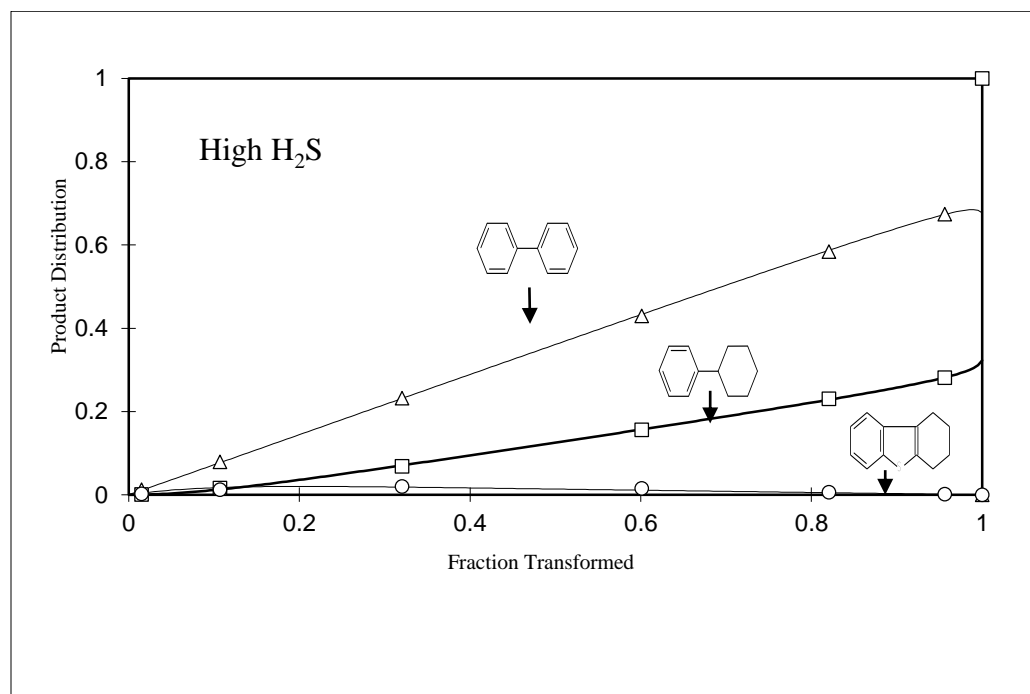

Supplement: f1 [file 8076534.f1.zip › 8076534.f1/Figure S2_JCHEM_2428381.pdf]
